# Supplementary material
Source: publisher figshare collection journal article supplement (https://tandf.figshare.com/ndownloader/files/14831258)
Supplement: Supplementary file 1 [file 14831258]

| Supplementary Table. Logistic Regression Analysis of Predictors for 30 Day Mortality from Time of Diagnosis of Those Starting Systemic Treatment | | | | |
| --- | --- | --- | --- | --- |
|  | **Univariate** | | **Multivariate** | |
| **Variable** | **OR** | **95% CI** | **OR** | **95% CI** |
| Age |  |  |  |  |
| <65 | 1 |  | 1 |  |
| ≥65 | 1.29 | 1.21 to 1.38 | 1.15 | 1.05 to 1.27 |
| Gender |  |  |  |  |
| Male | 1 |  | 1 |  |
| Female | 0.74 | 0.69 to 0.79 | 0.77 | 0.72 to 0.82 |
| Race |  |  |  |  |
| White | 1 |  | 1 |  |
| African-American | 0.73 | 0.65 to 0.81 | 0.73 | 0.64 to 0.82 |
| Others | 0.64 | 0.52 to 0.78 | 0.73 | 0.59 to 0.90 |
| Insurance Status |  |  |  |  |
| Private Insurance/Managed Care | 1 |  | 1 |  |
| Government | 1.39 | 1.29 to 1.49 | 1.17 | 1.06 to 1.29 |
| Uninsured | 1.04 | 0.92 to 1.19 | 1.06 | 0.93 to 1.21 |
| Missing | 1.63 | 1.41 to 1.89 | 1.63 | 1.41 to 1.90 |
| Residence |  |  |  |  |
| Metropolitan | 1 |  | 1 |  |
| Urban | 1.13 | 1.04 to 1.23 | 0.98 | 0.89 to 1.07 |
| Rural | 1.03 | 0.82 to 1.28 | 0.84 | 0.67 to 1.05 |
| Median Household Income (USD) |  |  |  |  |
| < 38,000 | 1 |  | 1 |  |
| 38,000-47,999 | 1.01 | 0.92 to 1.11 | 0.97 | 0.88 to 1.08 |
| 48,000-62,999 | 0.94 | 0.86 to 1.03 | 0.95 | 0.85 to 1.07 |
| 63,000 + | 0.88 | 0.80 to 0.97 | 0.98 | 0.86 to 1.12 |
| Percent Without High School Degree |  |  |  |  |
| ≥ 21.0% | 1 |  | 1 |  |
| 13.0-20.9% | 0.96 | 0.87 to 1.05 | 0.94 | 0.85 to 1.04 |
| 7.0-12.9% | 0.95 | 0.86 to 1.04 | 0.95 | 0.84 to 1.06 |
| <7.0% | 0.88 | 0.79 to 0.97 | 0.91 | 0.79 to 1.05 |
| Charlson-Deyo Comorbidity Score |  |  |  |  |
| 0 | 1 |  | 1 |  |
| 1 | 1.71 | 1.59 to 1.84 | 1.65 | 1.53 to 1.77 |
| 2 | 2.27 | 2.05 to 2.52 | 2.15 | 1.94 to 2.39 |
| 3+ | 2.65 | 2.27 to 3.10 | 2.53 | 2.16 to 2.96 |
| Facility Type |  |  |  |  |
| Community Cancer Program | 1 |  | 1 |  |
| Comprehensive Community Cancer Program | 1.13 | 1.02 to 1.25 | 1.14 | 1.03 to 1.26 |
| Academic/Research (includes NCI) | 0.69 | 0.62 to 0.78 | 0.78 | 0.69 to 0.88 |
| Integrated Network Cancer Program | 0.92 | 0.80 to 1.05 | 0.92 | 0.80 to 1.06 |
| Facility Location |  |  |  |  |
| West | 1 |  | 1 |  |
| Midwest | 1.36 | 1.23 to 1.49 | 1.19 | 1.08 to 1.32 |
| South | 1.35 | 1.23 to 1.49 | 1.22 | 1.11 to 1.36 |
| East | 1.27 | 1.12 to 1.43 | 1.17 | 1.04 to 1.33 |
| Year of Diagnosis |  |  |  |  |
| 2006 | 1 |  | 1 |  |
| 2007 | 0.96 | 0.84 to 1.11 | 0.96 | 0.83 to 1.10 |
| 2008 | 0.83 | 0.72 to 0.95 | 0.83 | 0.72 to 0.95 |
| 2009 | 0.79 | 0.68 to 0.90 | 0.80 | 0.70 to 0.92 |
| 2010 | 0.81 | 0.71 to 0.92 | 0.82 | 0.72 to 0.94 |
| 2011 | 0.78 | 0.68 to 0.89 | 0.80 | 0.70 to 0.91 |
| 2012 | 0.66 | 0.57 to 0.76 | 0.67 | 0.59 to 0.78 |
| 2013 | 0.66 | 0.58 to 0.76 | 0.68 | 0.60 to 0.79 |
| 2014 | 0.63 | 0.55 to 0.73 | 0.66 | 0.60 to 0.75 |
| Histology |  |  |  |  |
| Squamous Cell Carcinoma | 1 |  | 1 |  |
| Adenocarcinoma | 0.75 | 0.68 to 0.83 | 1.20 | 1.10 to 1.31 |
| Not Otherwise Specified | 0.78 | 0.73 to 0.85 | 1.37 | 1.24 to 1.52 |
| First Cancer Diagnosis in Lifetime |  |  |  |  |
| Yes | 1 |  | 1 |  |
| No (Has Prior History of Cancer) | 0.86 | 0.79 to 0.94 | 0.83 | 0.76 to 0.90 |
| Abbreviations: OR, Odds ratio; CI, confidence interval; USD: United States Dollar; NCI, National Cancer Institute | | | | |
